# Supplementary material
Source: PubMed Central journal article supplement (PMC1312376)

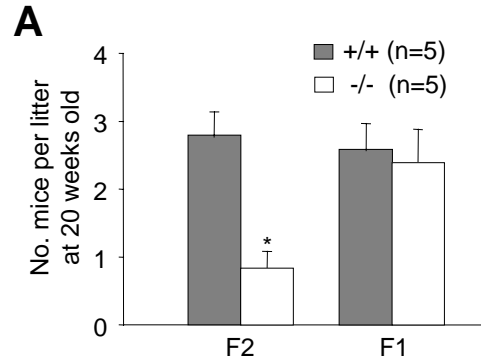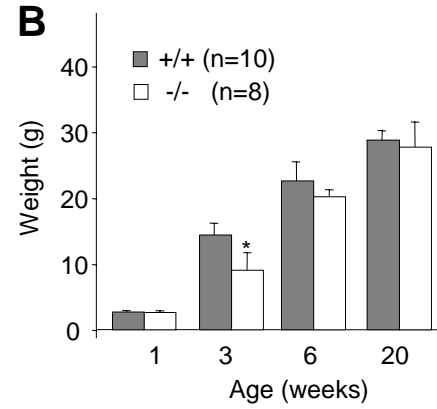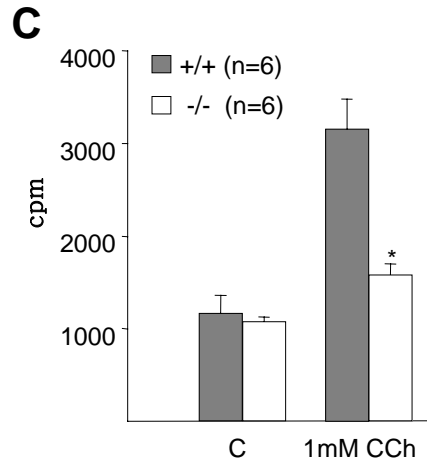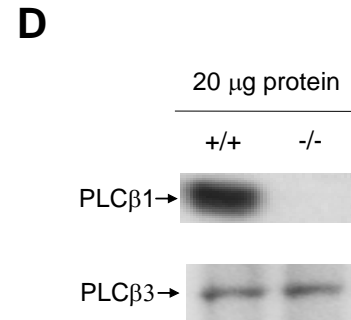

Supplement: pnas_0505498102_1.pdf [file pnas_0505498102_1.pdf]
